**Title: Mask Interventions in K12 Schools Can Also Reduce Community Transmission in Fall 2021**

Authors: Jessica Mele, MS<sup>1</sup>, Erik Rosenstrom, BS<sup>1</sup>, Julie Ivy, PhD<sup>1</sup>, Maria Mayorga, PhD<sup>1</sup>, Mehul D. Patel, PhD<sup>2</sup>, \*Julie Swann, PhD<sup>1</sup>

<sup>1</sup> Department of Industrial and Systems Engineering, North Carolina State University, 915 Partners Way, CB 7906, Raleigh, NC 27695, USA

<sup>2</sup> Department of Emergency Medicine, University of North Carolina at Chapel Hill, 170 Manning Dr. CB 7594, Chapel Hill, NC 27599, USA

\* Correspondence: Julie Swann, [jlswann@ncsu.edu](mailto:jlswann@ncsu.edu); Office phone (919-515-6423); NC State University; 915 Partners Way; Campus Box 7906, Raleigh, NC 27695

Word Count = 579 (not including abstract)

## **ABSTRACT**

The dominance of the COVID-19 Delta variant has renewed questions about the impact of K12 school policies, including the role of masks, on disease burden.<sup>1</sup> A recent study showed masks and testing could reduce infections in students, but failed to address the impact on the community,<sup>2</sup> while another showed masking is critical to slow disease spread in communities, but did not consider school openings under Delta.<sup>3</sup> We project the impact of school-masking on the community, which can inform policy decisions, and support healthcare system planning. Our findings indicate that the implementation of masking policies in school settings can reduce additional infections post-school opening by 23-36% for fully-open schools, with an additional 11-13% reduction for hybrid schooling, depending on mask quality and fit. Masking policies and hybrid schooling can also reduce peak hospitalization need by 71% and result in the fewest additional deaths post-school opening. We show that given the current vaccination rates within the community, the best option for children and the general population is to employ consistent high-quality masking, and use social distancing where possible.

## **INTRODUCTION**

The dominance of the COVID-19 Delta variant has renewed questions about the impact of K12 school policies, including the role of masks, on disease burden.<sup>1</sup> A recent study showed masks and testing could reduce infections in students, but failed to address the impact on the community,<sup>2</sup> while another showed masking is critical to slow disease spread in communities, but did not consider school openings under Delta.<sup>3</sup> We project the impact of school-masking on the community, which can inform policy decisions, and support healthcare system planning.

## **METHODS**

We use a stochastic agent-based Susceptible-Exposed-Infected-Recovered simulation model across a network representing North Carolina<sup>4</sup> to simulate school-masking for K12 students and project infections, hospitalizations, and deaths. Each scenario begins July 1, 2021, with schools opening August 23, where the Delta variant is 93% dominant. We study scenarios with school-masking (100% compliance) or without (0% compliance) with schools fully open or hybrid (rotating half joining remotely). For students wearing masks, we vary mask efficacy (50% or 70% reduction in transmission and susceptibility<sup>5</sup>) to capture quality and fit. Beginning when schools open, we assume working adults wear masks (50% effective) at rates of 50%, 40%, or 30% for urban, suburban, and rural census-tracts, respectively. We incorporate age-based, county vaccination levels by July 1 and assume vaccinations continue at June 2021 rates with a maximum vaccination rate of 95%. The simulation results are validated on hospitalizations and deaths (July 1-August 23, 2021). We incorporate time-based reinfections and initialization of recovered/vaccinated by county and age (see supplement).

## **RESULTS**

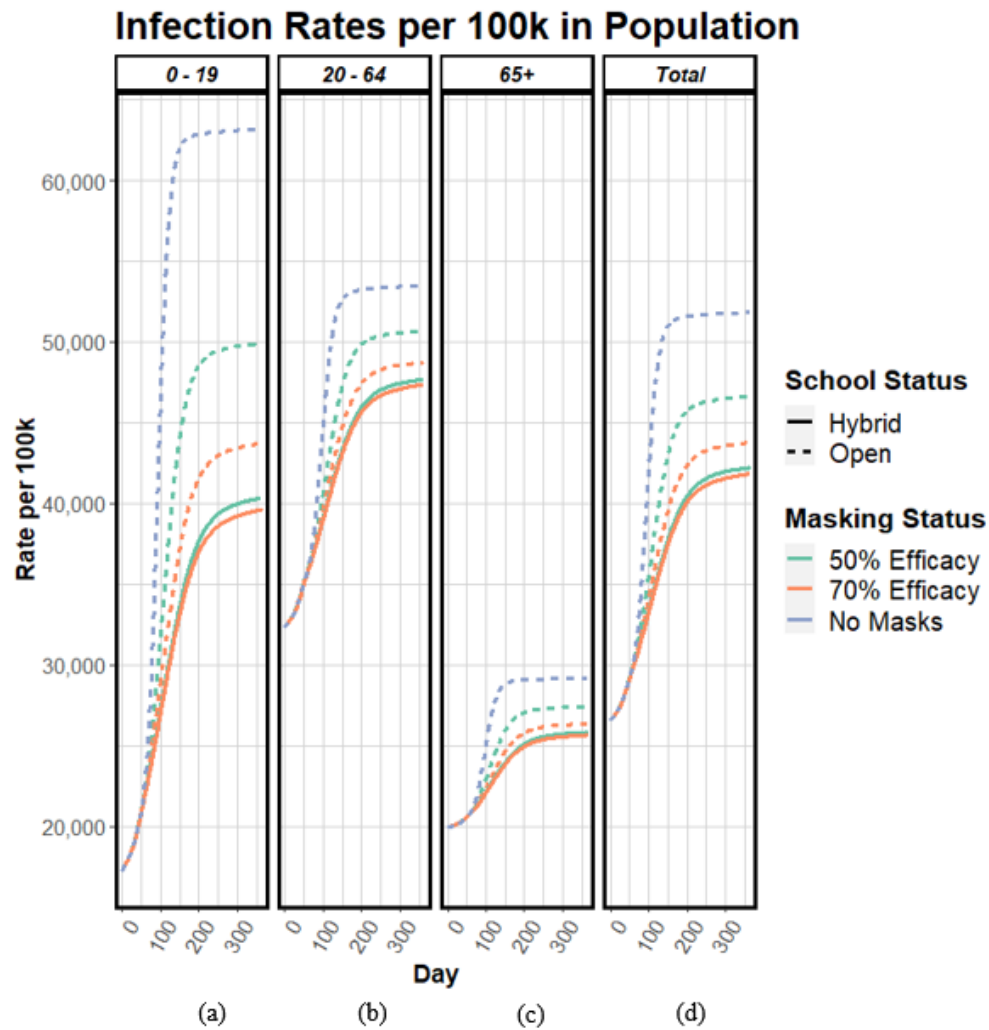

**Figure 1 (a-d):** Cumulative Infections per 100k in Population by Age Group and Total. Note:

The “No Masks” Scenario is only shown for open schools.

Figure 1(a)-(d) shows cumulative infections by age. We find that when schools are open with no masks (blue-dashed line) the highest number of new infections occur in all age groups, with 80% more additional infections (occurring post-school opening) than the best scenarios studied .

When students wear masks that are 50% effective we observe a 23% reduction in additional

infections in the general population post-school opening, whereas we observe a 36% reduction in additional infections when students wear masks that are 70% effective, compared to no school-masking. Hybrid schooling provides an additional 11-13% reduction in additional cases, compared to the best school fully-open scenario.

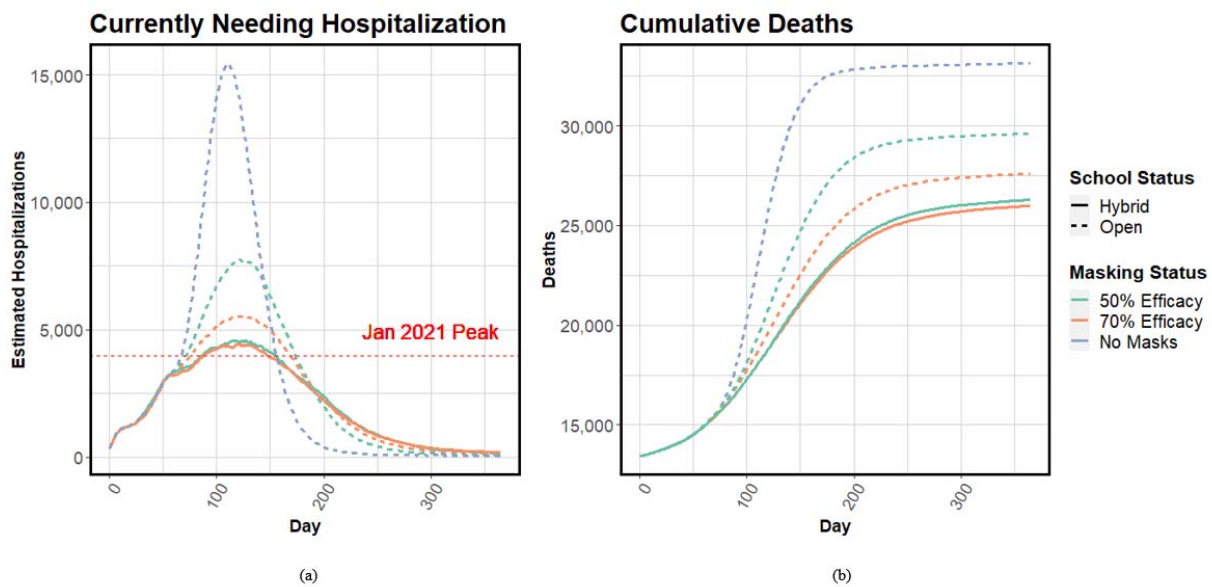

**Figure 2 (a,b):** (a)Currently Needing Hospitalization and (b) Cumulative Deaths Over Time

Notes: (a) The red-dashed, horizontal line signifies the highest observed number of hospitalizations as of September 10th, 2021, 3,992, in North Carolina since the start of the pandemic.

Figure 2(a)-(b) displays hospitalizations and deaths over time. When schools are open without masking, the peak estimated hospitalization level exceeds the peak observed in January 2021, with over 18,000 new deaths occurring within 6 months of schools opening. If schools are hybrid or there is high mask-efficacy, we observe fewer deaths and a reduction in peak hospitalization

need of 71%. With schools fully open, a 20% increase in school mask-efficacy leads to a 7% and 29% reduction in cumulative deaths and peak hospitalizations. With no school-masking, approximately 6%, 46%, and 48% of hospitalizations occur in children, adults, and 65+, respectively.

## **DISCUSSION**

We show school-masking can reduce infections in the overall community. Without school-masking, we show hospitals are likely to be further overwhelmed, which can increase all-cause mortality. Higher mask efficacy in schools can also reduce infections, hospitalizations, and deaths in the community. This supports ensuring all students consistently wear high-quality, well-fitting masks<sup>6</sup>. Increasing social distance (hybrid schooling) can further reduce negative outcomes although it is more disruptive to learning. The study did not include surveillance testing for further reductions, nor did it quantify school absences from isolation or quarantine, which is likely highest in no-mask scenarios.

We show that given the current vaccination rates within the community, the best option for children and the general population is to employ consistent high-quality masking, and use social distancing where possible.

## **ACKNOWLEDGEMENTS**

**Author Contributions:** Drs. Ivy, Mayorga and Swann had full access to all of the data in the study and take responsibility for the integrity of the data and the accuracy of the data analysis.

*Concept and design:* Mele, Rosenstrom, Ivy, Mayorga, Patel, Swann.

*Acquisition, analysis, or interpretation of data:* Mele, Rosenstrom Ivy, Mayorga, Swann, Patel.

*Drafting of the manuscript:* Mele, Rosenstrom, Swann

*Critical revision of the manuscript for important intellectual content:* All authors.

*Statistical analysis:* Mele, Rosenstrom, Ivy, Mayorga, Swann

*Administrative, technical, or material support:* Swann

**Conflict of Interest Disclosures:** Dr. Patel reported receiving grants from the National Center for Advancing Translational Sciences (NCATS) of the National Institutes of Health (NIH) and from the Council of State and Territorial Epidemiologists (CSTE) during the conduct of the study. Mr. Rosenstrom reported receiving support from the Centers for Disease Control and Prevention (CDC), the Council of State and Territorial Epidemiologists (CSTE), and NCATS/NIH during the conduct of the study. Ms. Mele reported receiving support from the CDC, CSTE, and NCATS/NIH during the conduct of the study. Dr. Ivy reported receiving grants from the CDC, CSTE, NCATS, and NC State University during the conduct of the study. Dr. Mayorga reported receiving grants from the NCATS/NIH, CSTE, CDC, and NC State University during the conduct of the study. Dr. Swann reported receiving grants from NCATS/NIH, CDC, CSTE, and NC State University during the conduct of the study. No other disclosures were reported.

**Funding/Support:** This research was supported by grant UL1TR002489 from the NCATS/NIH and Cooperative Agreement NU38OT000297 from the CSTE and the CDC.

**Role of the Funder/Sponsor:** The sponsors had no role in the design and conduct of the study; collection, management, analysis, and interpretation of the data; preparation, review, or approval of the manuscript; and decision to submit the manuscript for publication.

**Disclaimer:** The content is solely the responsibility of the authors and does not necessarily represent the official views of the NIH, CSTE, CDC, or the universities employing the researchers.

**Additional Contributions:** Pinar Keskinocak

## REFERENCES

1. Whitehurst L, Long C. Mask debate moves from school boards to courtrooms. ABC27 News. Published August 28, 2021. Accessed August 31, 2021. <https://www.abc27.com/news/health/coronavirus/mask-debate-moves-from-school-boards-to-courtrooms/>
2. Zhang Y, Johnson K, Lich KH, et al. COVID-19 Projections for K12 Schools in Fall 2021: Significant Transmission without Interventions. *medRxiv*. Pre-print online January 1, 2021:2021.08.10.21261726. doi:10.1101/2021.08.10.21261726
3. Rosenstrom E, Oruc BE, Hupert N, et al. High-Quality Masks Reduce COVID-19 Infections and Deaths in the US. *Forthcoming in the Winter Simulation Conference Proceedings*.
4. Patel MD, Rosenstrom E, Ivy JS, et al. Association of Simulated COVID-19 Vaccination and Nonpharmaceutical Interventions With Infections, Hospitalizations, and



Mortality. *JAMA Network Open*. 2021;4(6):e2110782-e2110782.

doi:10.1001/jamanetworkopen.2021.10782

5. Brooks JT, Butler JC. Effectiveness of Mask Wearing to Control Community Spread of SARS-CoV-2. *JAMA*. 2021;325(10):998-999. doi:10.1001/jama.2021.1505

6. CDC. Guidance for COVID-19 Prevention in K-12 Schools. Centers for Disease Control and Prevention. Published August 5, 2021. Accessed August 31, 2021.

<https://www.cdc.gov/coronavirus/2019-ncov/community/schools-childcare/k-12-guidance.html>
